# Supplementary material
Source: PubMed Central journal article supplement (PMC4634314)
Supplement: supp_cwv058_cwv058supp_tables2-7.pdf [file supp_cwv058_cwv058supp_tables2-7.pdf]

## Supplementary Table S2: Quantification of glycopeptides from RNase B by mass spectrometry

Quantification by peak area

| observed m/z | z | [M+H] <sup>+</sup> | peptide [M+H] <sup>+</sup> | glycan   | glycan structure | interday (N) | intraday (N) | average | SD   |       |
|--------------|---|--------------------|----------------------------|----------|------------------|--------------|--------------|---------|------|-------|
| 1295.540     |   | 3                  | 3884.626                   | 2668.155 | 1216.471         | M5Gn2        | 3            | 3       | 0.55 | 0.007 |
| 1349.557     |   | 3                  | 4046.679                   | 2668.155 | 1378.524         | M6Gn2        | 3            | 3       | 0.25 | 0.004 |
| 1403.574     |   | 3                  | 4208.731                   | 2668.155 | 1540.576         | M7Gn2        | 3            | 3       | 0.06 | 0.001 |
| 1457.593     |   | 3                  | 4370.786                   | 2668.155 | 1702.631         | M8Gn2        | 3            | 3       | 0.11 | 0.008 |
| 1511.610     |   | 3                  | 4532.838                   | 2668.155 | 1864.683         | M9Gn2        | 3            | 3       | 0.03 | 0.003 |

| observed m/z | z | [M+H] <sup>+</sup> | peptide [M+H] <sup>+</sup> | glycan   | glycan structure | interday (N) | intraday (N) | average | SD   |       |
|--------------|---|--------------------|----------------------------|----------|------------------|--------------|--------------|---------|------|-------|
| 971.905      |   | 4                  | 3884.626                   | 2668.155 | 1216.471         | M5Gn2        | 3            | 3       | 0.40 | 0.007 |
| 1012.418     |   | 4                  | 4046.678                   | 2668.155 | 1378.523         | M6Gn2        | 3            | 3       | 0.28 | 0.006 |
| 1052.931     |   | 4                  | 4208.731                   | 2668.155 | 1540.576         | M7Gn2        | 3            | 3       | 0.09 | 0.001 |
| 1093.447     |   | 4                  | 4370.794                   | 2668.155 | 1702.639         | M8Gn2        | 3            | 3       | 0.18 | 0.005 |
| 1133.958     |   | 4                  | 4532.838                   | 2668.155 | 1864.683         | M9Gn2        | 3            | 3       | 0.06 | 0.004 |

Quantification by peak height

| [M+H] <sup>+</sup> | glycan structure | average | SD    | interday (N) | intraday (N) |
|--------------------|------------------|---------|-------|--------------|--------------|
| 3884.626           | M5Gn2            | 0.391   | 0.012 | 3            | 3            |
| 4046.678           | M6Gn2            | 0.265   | 0.080 | 3            | 3            |
| 4208.731           | M7Gn2            | 0.080   | 0.070 | 3            | 3            |
| 4370.794           | M8Gn2            | 0.189   | 0.020 | 3            | 3            |
| 4532.838           | M9Gn2            | 0.075   | 0.010 | 3            | 3            |

## Supplementary table: Quantification of glycans from RNase B by HPLC-FD

|       | Average | SD    | interday (N) | intraday (N) |
|-------|---------|-------|--------------|--------------|
| M5Gn2 | 0.42    | 0.004 | 3            | 3            |
| M6Gn2 | 0.25    | 0.003 | 3            | 3            |
| M7Gn2 | 0.10    | 0.002 | 3            | 3            |
| M8Gn2 | 0.16    | 0.001 | 3            | 3            |
| M9Gn2 | 0.07    | 0.005 | 3            | 3            |

**Supplementary Table S3: Quantification results for glycopeptides from ePdiP by mass spectrometry**  
**file: PDI summary-endogeneous-Biological replicate\_20131023\_raw data**

**Site 1**

| ions used for quantification | z | [M+H] <sup>+</sup> | peptide [M+H] <sup>+</sup> | glycan   | glycan stucture | peptide sequence             | Average | SD    |
|------------------------------|---|--------------------|----------------------------|----------|-----------------|------------------------------|---------|-------|
| 1492.325                     | 3 | 4474.981           | 3258.520                   | 1216.461 | M5Gn2           | NITLAQIDCTENQDLCMEHNIPGFPSLK | 0.07    | 0.015 |
| 1546.338                     | 3 | 4637.023           | 3258.520                   | 1378.503 | M6Gn2           | NITLAQIDCTENQDLCMEHNIPGFPSLK | 0.19    | 0.011 |
| 1600.357                     | 3 | 4799.080           | 3258.520                   | 1540.560 | M7Gn2           | NITLAQIDCTENQDLCMEHNIPGFPSLK | 0.49    | 0.013 |
| 1654.376                     | 3 | 4961.135           | 3258.520                   | 1702.615 | M8Gn2           | NITLAQIDCTENQDLCMEHNIPGFPSLK | 0.12    | 0.004 |
| 1708.394                     | 3 | 5123.190           | 3258.520                   | 1864.670 | M9Gn2           | NITLAQIDCTENQDLCMEHNIPGFPSLK | 0.12    | 0.007 |

**Site 2**

| ions used for quantification | z | [M+H] <sup>+</sup> | peptide [M+H] <sup>+</sup> | glycan   | glycan stucture | peptide sequence | Average | SD    |
|------------------------------|---|--------------------|----------------------------|----------|-----------------|------------------|---------|-------|
| 1398.581                     | 2 | 2796.170           | 1579.704                   | 1216.466 | M5Gn2           | NSDVNSIDYEGPR    | 0.30    | 0.017 |
| 1479.609                     | 2 | 2958.226           | 1579.704                   | 1378.522 | M6Gn2           | NSDVNSIDYEGPR    | 0.28    | 0.004 |
| 1560.637                     | 2 | 3120.282           | 1579.704                   | 1540.578 | M7Gn2           | NSDVNSIDYEGPR    | 0.31    | 0.010 |
| 1641.666                     | 2 | 3282.339           | 1579.704                   | 1702.635 | M8Gn2           | NSDVNSIDYEGPR    | 0.07    | 0.003 |
| 1722.693                     | 2 | 3444.393           | 1579.704                   | 1864.689 | M9Gn2           | NSDVNSIDYEGPR    | 0.04    | 0.003 |

**Site 3**

| ions used for quantification | z | [M+H] <sup>+</sup> | peptide [M+H] <sup>+</sup> | glycan   | glycan stucture | peptide sequence                | Average | SD    |
|------------------------------|---|--------------------|----------------------------|----------|-----------------|---------------------------------|---------|-------|
| 1477.063                     | 3 | 4429.196           | 3212.710                   | 1216.486 | M5Gn2           | QSQPAVAVVADLPAYLANETFVTPVIVQSGK | 0.19    | 0.035 |
| 1531.079                     | 3 | 4591.244           | 3212.710                   | 1378.534 | M6Gn2           | QSQPAVAVVADLPAYLANETFVTPVIVQSGK | 0.27    | 0.012 |
| 1585.098                     | 3 | 4753.303           | 3212.710                   | 1540.593 | M7Gn2           | QSQPAVAVVADLPAYLANETFVTPVIVQSGK | 0.29    | 0.024 |
| 1639.115                     | 3 | 4915.353           | 3212.710                   | 1702.643 | M8Gn2           | QSQPAVAVVADLPAYLANETFVTPVIVQSGK | 0.17    | 0.016 |
| 1693.131                     | 3 | 5077.399           | 3212.710                   | 1864.689 | M9Gn2           | QSQPAVAVVADLPAYLANETFVTPVIVQSGK | 0.08    | 0.012 |

**Site 4**

| ions used for quantification | z | [M+H] <sup>+</sup> | peptide [M+H] <sup>+</sup> | glycan   | glycan stucture | peptide sequence | Average | SD    |
|------------------------------|---|--------------------|----------------------------|----------|-----------------|------------------|---------|-------|
| 1462.599                     | 2 | 2924.206           | 1707.775                   | 1216.431 | M5Gn2           | IDADFNFATFYSMANK | 0.02    | 0.005 |
| 1543.627                     | 2 | 3086.262           | 1707.775                   | 1378.487 | M6Gn2           | IDADFNFATFYSMANK | 0.07    | 0.015 |
| 1624.655                     | 2 | 3248.318           | 1707.775                   | 1540.543 | M7Gn2           | IDADFNFATFYSMANK | 0.27    | 0.004 |
| 1705.683                     | 2 | 3410.373           | 1707.775                   | 1702.598 | M8Gn2           | IDADFNFATFYSMANK | 0.44    | 0.013 |
| 1786.707                     | 2 | 3572.422           | 1707.775                   | 1864.647 | M9Gn2           | IDADFNFATFYSMANK | 0.20    | 0.026 |

**Site 5**

| ions used for quantification | z | [M+H] <sup>+</sup> | peptide [M+H] <sup>+</sup> | glycan   | glycan stucture | peptide sequence       | Average | SD    |
|------------------------------|---|--------------------|----------------------------|----------|-----------------|------------------------|---------|-------|
| 1228.900                     | 3 | 3684.701           | 2468.250                   | 1216.451 | M5Gn2           | LAPTYQELADTYANATSDVLIK | 0.13    | 0.023 |
| 1282.919                     | 3 | 3846.758           | 2468.250                   | 1378.508 | M6Gn2           | LAPTYQELADTYANATSDVLIK | 0.26    | 0.008 |
| 1336.940                     | 3 | 4008.819           | 2468.250                   | 1540.569 | M7Gn2           | LAPTYQELADTYANATSDVLIK | 0.34    | 0.014 |
| 1390.956                     | 3 | 4170.868           | 2468.250                   | 1702.618 | M8Gn2           | LAPTYQELADTYANATSDVLIK | 0.19    | 0.011 |
| 1444.973                     | 3 | 4332.918           | 2468.250                   | 1864.668 | M9Gn2           | LAPTYQELADTYANATSDVLIK | 0.09    | 0.008 |

**Supplementary Table S4: Quantification results for glycopeptides from different domains of Pdip by mass spectrometry  
file: PDI summary-endogeneous\_secreted domain study 20140304-replicate**

**abb' domain**

**Site 1**

| ions used for quantification | z | [M+H] <sup>+</sup> | peptide [M] | glycan   | glycan stucture | peptide sequence             | Average | SD    |
|------------------------------|---|--------------------|-------------|----------|-----------------|------------------------------|---------|-------|
| 1492.325                     | 3 | 4474.981           | 3258.520    | 1216.461 | M5Gn2           | NITLAQIDCTENQDLCMEHNIPGFPSLK | 0.30    | 0.061 |
| 1546.338                     | 3 | 4637.023           | 3258.520    | 1378.503 | M6Gn2           | NITLAQIDCTENQDLCMEHNIPGFPSLK | 0.22    | 0.010 |
| 1600.357                     | 3 | 4799.080           | 3258.520    | 1540.560 | M7Gn2           | NITLAQIDCTENQDLCMEHNIPGFPSLK | 0.26    | 0.032 |
| 1654.376                     | 3 | 4961.135           | 3258.520    | 1702.615 | M8Gn2           | NITLAQIDCTENQDLCMEHNIPGFPSLK | 0.11    | 0.010 |
| 1708.394                     | 3 | 5123.190           | 3258.520    | 1864.670 | M9Gn2           | NITLAQIDCTENQDLCMEHNIPGFPSLK | 0.11    | 0.026 |

**Site 2**

| ions used for quantification | z | [M+H] <sup>+</sup> | peptide [M] | glycan   | glycan stucture | peptide sequence | Average | SD    |
|------------------------------|---|--------------------|-------------|----------|-----------------|------------------|---------|-------|
| 1398.581                     | 2 | 2796.170           | 1579.704    | 1216.466 | M5Gn2           | NSDVNSIDYEGPR    | 0.65    | 0.065 |
| 1479.609                     | 2 | 2958.226           | 1579.704    | 1378.522 | M6Gn2           | NSDVNSIDYEGPR    | 0.19    | 0.028 |
| 1560.637                     | 2 | 3120.282           | 1579.704    | 1540.578 | M7Gn2           | NSDVNSIDYEGPR    | 0.11    | 0.023 |
| 1641.666                     | 2 | 3282.339           | 1579.704    | 1702.635 | M8Gn2           | NSDVNSIDYEGPR    | 0.04    | 0.013 |
| 1722.693                     | 2 | 3444.393           | 1579.704    | 1864.689 | M9Gn2           | NSDVNSIDYEGPR    | 0.01    | 0.005 |

**Site 3**

| ions used for quantification | z | [M+H] <sup>+</sup> | peptide [M] | glycan   | glycan stucture | peptide sequence                | Average | SD    |
|------------------------------|---|--------------------|-------------|----------|-----------------|---------------------------------|---------|-------|
| 1477.063                     | 3 | 4429.196           | 3212.710    | 1216.486 | M5Gn2           | QSQPAVAVVADLPAYLANETFVTPVIVQSGK | 0.42    | 0.093 |
| 1531.079                     | 3 | 4591.244           | 3212.710    | 1378.534 | M6Gn2           | QSQPAVAVVADLPAYLANETFVTPVIVQSGK | 0.20    | 0.020 |
| 1585.098                     | 3 | 4753.303           | 3212.710    | 1540.593 | M7Gn2           | QSQPAVAVVADLPAYLANETFVTPVIVQSGK | 0.15    | 0.032 |
| 1639.115                     | 3 | 4915.353           | 3212.710    | 1702.643 | M8Gn2           | QSQPAVAVVADLPAYLANETFVTPVIVQSGK | 0.16    | 0.026 |
| 1693.131                     | 3 | 5077.399           | 3212.710    | 1864.689 | M9Gn2           | QSQPAVAVVADLPAYLANETFVTPVIVQSGK | 0.07    | 0.024 |

**Site 4**

| ions used for quantification | z | [M+H] <sup>+</sup> | peptide [M] | glycan   | glycan stucture | peptide sequence              | Average | SD    |
|------------------------------|---|--------------------|-------------|----------|-----------------|-------------------------------|---------|-------|
| 1462.599                     | 2 | 2924.206           | 1707.775    | 1216.431 | M5Gn2           | IDADF <sup>N</sup> NATFYSMANK | 0.14    | 0.029 |
| 1543.627                     | 2 | 3086.262           | 1707.775    | 1378.487 | M6Gn2           | IDADF <sup>N</sup> NATFYSMANK | 0.20    | 0.012 |
| 1624.655                     | 2 | 3248.318           | 1707.775    | 1540.543 | M7Gn2           | IDADF <sup>N</sup> NATFYSMANK | 0.32    | 0.032 |
| 1705.683                     | 2 | 3410.373           | 1707.775    | 1702.598 | M8Gn2           | IDADF <sup>N</sup> NATFYSMANK | 0.29    | 0.018 |
| 1786.707                     | 2 | 3572.422           | 1707.775    | 1864.647 | M9Gn2           | IDADF <sup>N</sup> NATFYSMANK | 0.04    | 0.011 |

**ab domain**

| Average | SD    |
|---------|-------|
| 0.29    | 0.055 |
| 0.20    | 0.012 |
| 0.25    | 0.023 |
| 0.12    | 0.014 |
| 0.14    | 0.019 |

| Average | SD    |
|---------|-------|
| 0.59    | 0.061 |
| 0.16    | 0.026 |
| 0.13    | 0.027 |
| 0.09    | 0.014 |
| 0.03    | 0.006 |

| Average | SD    |
|---------|-------|
| 0.44    | 0.084 |
| 0.20    | 0.024 |
| 0.14    | 0.018 |
| 0.17    | 0.034 |
| 0.05    | 0.031 |

| Average | SD    |
|---------|-------|
| 0.14    | 0.024 |
| 0.19    | 0.016 |
| 0.25    | 0.019 |
| 0.36    | 0.013 |
| 0.06    | 0.011 |

**bb' domain**

| Average | SD   |
|---------|------|
| n.d.    | n.d. |

| Average | SD   |
|---------|------|
| n.d.    | n.d. |

| Average | SD   |
|---------|------|
| n.d.    | n.d. |

| Average | SD    |
|---------|-------|
| 0.28    | 0.035 |
| 0.33    | 0.028 |
| 0.28    | 0.021 |
| 0.10    | 0.013 |
| 0.01    | 0.004 |

**b domain**

| Average | SD   |
|---------|------|
| n.d.    | n.d. |

| Average | SD   |
|---------|------|
| n.d.    | n.d. |

| Average | SD   |
|---------|------|
| n.d.    | n.d. |

| Average | SD    |
|---------|-------|
| 0.32    | 0.033 |
| 0.30    | 0.023 |
| 0.31    | 0.018 |
| 0.06    | 0.015 |
| 0.00    | 0.002 |

**Supplementary Table S5: Quantification results for glycopeptides from P dip treated with kifunensine first and mannosidase by mass spectrometry**  
**file: PDI endo treated with Kif and MNS\_20140320**  
**three biological replicates**

**Site 1 (1st)**

| ions used for quantification | z | [M+H] <sup>+</sup> | peptide [M+H] <sup>+</sup> | glycan   | glycan structure | peptide sequence             | T0   | T1   | T3   | T10  | T30  | T60  |
|------------------------------|---|--------------------|----------------------------|----------|------------------|------------------------------|------|------|------|------|------|------|
| 1492.325                     | 3 | 4474.981           | 3258.520                   | 1216.461 | M5Gn2            | NITLAQIDCTENQDLCMEHNIPGFPPLK | 0.00 | 0.00 | 0.00 | 0.00 | 0.00 | 0.00 |
| 1546.338                     | 3 | 4637.023           | 3258.520                   | 1378.503 | M6Gn2            | NITLAQIDCTENQDLCMEHNIPGFPPLK | 0.00 | 0.00 | 0.00 | 0.00 | 0.00 | 0.00 |
| 1600.357                     | 3 | 4799.080           | 3258.520                   | 1540.560 | M7Gn2            | NITLAQIDCTENQDLCMEHNIPGFPPLK | 0.00 | 0.00 | 0.00 | 0.00 | 0.00 | 0.00 |
| 1654.376                     | 3 | 4961.135           | 3258.520                   | 1702.615 | M8Gn2            | NITLAQIDCTENQDLCMEHNIPGFPPLK | 0.01 | 0.15 | 0.56 | 0.93 | 0.93 | 0.95 |
| 1708.394                     | 3 | 5123.190           | 3258.520                   | 1864.670 | M9Gn2            | NITLAQIDCTENQDLCMEHNIPGFPPLK | 0.99 | 0.85 | 0.44 | 0.07 | 0.07 | 0.04 |

**Site 2 (1st)**

| ions used for quantification | z | [M+H] <sup>+</sup> | peptide [M+H] <sup>+</sup> | glycan   | glycan structure | peptide sequence | T0   | T1   | T3   | T10  | T30  | T60  |
|------------------------------|---|--------------------|----------------------------|----------|------------------|------------------|------|------|------|------|------|------|
| 1398.581                     | 2 | 2796.170           | 1579.704                   | 1216.466 | M5Gn2            | NSDVNSIDYEGPR    | 0.00 | 0.00 | 0.01 | 0.01 | 0.01 | 0.01 |
| 1479.609                     | 2 | 2958.226           | 1579.704                   | 1378.522 | M6Gn2            | NSDVNSIDYEGPR    | 0.01 | 0.00 | 0.01 | 0.01 | 0.01 | 0.01 |
| 1560.637                     | 2 | 3120.282           | 1579.704                   | 1540.578 | M7Gn2            | NSDVNSIDYEGPR    | 0.01 | 0.01 | 0.01 | 0.01 | 0.02 | 0.03 |
| 1641.666                     | 2 | 3282.339           | 1579.704                   | 1702.635 | M8Gn2            | NSDVNSIDYEGPR    | 0.03 | 0.38 | 0.83 | 0.83 | 0.96 | 0.95 |
| 1722.693                     | 2 | 3444.393           | 1579.704                   | 1864.689 | M9Gn2            | NSDVNSIDYEGPR    | 0.96 | 0.61 | 0.14 | 0.14 | 0.00 | 0.00 |

**Site 3 (1st)**

| ions used for quantification | z | [M+H] <sup>+</sup> | peptide [M+H] <sup>+</sup> | glycan   | glycan structure | peptide sequence                | T0   | T1   | T3   | T10  | T30  | T60  |
|------------------------------|---|--------------------|----------------------------|----------|------------------|---------------------------------|------|------|------|------|------|------|
| 1477.063                     | 3 | 4429.196           | 3212.710                   | 1216.486 | M5Gn2            | QSQPAVAVVADLPAYLANETFVTPVIVQSGK | 0.00 | 0.00 | 0.00 | 0.00 | 0.00 | 0.00 |
| 1531.079                     | 3 | 4591.244           | 3212.710                   | 1378.534 | M6Gn2            | QSQPAVAVVADLPAYLANETFVTPVIVQSGK | 0.00 | 0.00 | 0.00 | 0.00 | 0.00 | 0.00 |
| 1585.098                     | 3 | 4753.303           | 3212.710                   | 1540.593 | M7Gn2            | QSQPAVAVVADLPAYLANETFVTPVIVQSGK | 0.00 | 0.00 | 0.01 | 0.01 | 0.02 | 0.02 |
| 1639.115                     | 3 | 4915.353           | 3212.710                   | 1702.643 | M8Gn2            | QSQPAVAVVADLPAYLANETFVTPVIVQSGK | 0.02 | 0.28 | 0.78 | 0.96 | 0.98 | 0.98 |
| 1693.131                     | 3 | 5077.399           | 3212.710                   | 1864.689 | M9Gn2            | QSQPAVAVVADLPAYLANETFVTPVIVQSGK | 0.98 | 0.72 | 0.21 | 0.03 | 0.00 | 0.00 |

**Site 4 (1st)**

| ions used for quantification | z | [M+H] <sup>+</sup> | peptide [M+H] <sup>+</sup> | glycan   | glycan structure | peptide sequence | T0   | T1   | T3   | T10  | T30  | T60  |
|------------------------------|---|--------------------|----------------------------|----------|------------------|------------------|------|------|------|------|------|------|
| 1462.599                     | 2 | 2924.206           | 1707.775                   | 1216.431 | M5Gn2            | IDADFNATFYSMANK  | 0.00 | 0.00 | 0.00 | 0.00 | 0.00 | 0.00 |
| 1543.627                     | 2 | 3086.262           | 1707.775                   | 1378.487 | M6Gn2            | IDADFNATFYSMANK  | 0.00 | 0.00 | 0.00 | 0.00 | 0.00 | 0.00 |
| 1624.655                     | 2 | 3248.318           | 1707.775                   | 1540.543 | M7Gn2            | IDADFNATFYSMANK  | 0.01 | 0.01 | 0.01 | 0.01 | 0.02 | 0.02 |
| 1705.683                     | 2 | 3410.373           | 1707.775                   | 1702.598 | M8Gn2            | IDADFNATFYSMANK  | 0.01 | 0.09 | 0.35 | 0.66 | 0.91 | 0.96 |
| 1786.707                     | 2 | 3572.422           | 1707.775                   | 1864.647 | M9Gn2            | IDADFNATFYSMANK  | 0.98 | 0.90 | 0.64 | 0.33 | 0.07 | 0.01 |

**Site 5 (1st)**

| ions used for quantification | z | [M+H] <sup>+</sup> | peptide [M+H] <sup>+</sup> | glycan   | glycan structure | peptide sequence       | T0   | T1   | T3   | T10  | T30  | T60  |
|------------------------------|---|--------------------|----------------------------|----------|------------------|------------------------|------|------|------|------|------|------|
| 1228.900                     | 3 | 3684.701           | 2468.250                   | 1216.451 | M5Gn2            | LAPTYQELADTYANATSDVLIK | 0.00 | 0.00 | 0.00 | 0.00 | 0.00 | 0.00 |
| 1282.919                     | 3 | 3846.758           | 2468.250                   | 1378.508 | M6Gn2            | LAPTYQELADTYANATSDVLIK | 0.00 | 0.00 | 0.00 | 0.00 | 0.01 | 0.01 |
| 1336.940                     | 3 | 4008.819           | 2468.250                   | 1540.569 | M7Gn2            | LAPTYQELADTYANATSDVLIK | 0.00 | 0.01 | 0.01 | 0.03 | 0.03 | 0.04 |
| 1390.956                     | 3 | 4170.868           | 2468.250                   | 1702.618 | M8Gn2            | LAPTYQELADTYANATSDVLIK | 0.02 | 0.22 | 0.62 | 0.94 | 0.95 | 0.93 |
| 1444.973                     | 3 | 4332.918           | 2468.250                   | 1864.668 | M9Gn2            | LAPTYQELADTYANATSDVLIK | 0.97 | 0.77 | 0.36 | 0.03 | 0.01 | 0.01 |

**Site 1 (2nd)**

| T0   | T1   | T3   | T10  | T30  | T60  |
|------|------|------|------|------|------|
| 0.00 | 0.00 | 0.00 | 0.00 | 0.00 | 0.00 |
| 0.00 | 0.00 | 0.00 | 0.00 | 0.00 | 0.00 |
| 0.00 | 0.00 | 0.00 | 0.00 | 0.00 | 0.00 |
| 0.00 | 0.21 | 0.51 | 0.91 | 0.91 | 0.90 |
| 1.00 | 0.79 | 0.49 | 0.09 | 0.09 | 0.09 |

**Site 2 (2nd)**

| T0   | T1   | T3   | T10  | T30  | T60  |
|------|------|------|------|------|------|
| 0.00 | 0.00 | 0.00 | 0.01 | 0.01 | 0.01 |
| 0.00 | 0.00 | 0.00 | 0.01 | 0.01 | 0.01 |
| 0.00 | 0.01 | 0.02 | 0.02 | 0.02 | 0.03 |
| 0.03 | 0.42 | 0.79 | 0.96 | 0.96 | 0.96 |
| 0.96 | 0.57 | 0.19 | 0.00 | 0.00 | 0.00 |

**Site 3 (2nd)**

| T0   | T1   | T3   | T10  | T30  | T60  |
|------|------|------|------|------|------|
| 0.00 | 0.00 | 0.00 | 0.00 | 0.00 | 0.00 |
| 0.00 | 0.00 | 0.00 | 0.00 | 0.01 | 0.00 |
| 0.01 | 0.01 | 0.02 | 0.02 | 0.01 | 0.02 |
| 0.03 | 0.35 | 0.74 | 0.98 | 0.98 | 0.97 |
| 0.96 | 0.64 | 0.24 | 0.00 | 0.00 | 0.00 |

**Site 4 (2nd)**

| T0   | T1   | T3   | T10  | T30  | T60  |
|------|------|------|------|------|------|
| 0.00 | 0.00 | 0.00 | 0.00 | 0.00 | 0.01 |
| 0.00 | 0.00 | 0.00 | 0.00 | 0.00 | 0.00 |
| 0.01 | 0.01 | 0.01 | 0.02 | 0.01 | 0.02 |
| 0.01 | 0.13 | 0.33 | 0.66 | 0.89 | 0.95 |
| 0.97 | 0.86 | 0.66 | 0.31 | 0.09 | 0.02 |

**Site 5 (2nd)**

| T0   | T1   | T3   | T10  | T30  | T60  |
|------|------|------|------|------|------|
| 0.00 | 0.00 | 0.00 | 0.00 | 0.00 | 0.00 |
| 0.00 | 0.00 | 0.00 | 0.01 | 0.00 | 0.00 |
| 0.01 | 0.01 | 0.02 | 0.02 | 0.03 | 0.03 |
| 0.03 | 0.24 | 0.59 | 0.93 | 0.95 | 0.95 |
| 0.96 | 0.75 | 0.38 | 0.04 | 0.01 | 0.01 |

**Site 1 (3rd)**

| T0   | T1   | T3   | T10  | T30  | T60  |
|------|------|------|------|------|------|
| 0.00 | 0.00 | 0.00 | 0.00 | 0.00 | 0.00 |
| 0.00 | 0.00 | 0.00 | 0.00 | 0.00 | 0.00 |
| 0.00 | 0.00 | 0.00 | 0.00 | 0.02 | 0.05 |
| 0.00 | 0.22 | 0.55 | 0.94 | 0.98 | 0.95 |
| 1.00 | 0.78 | 0.45 | 0.06 | 0.00 | 0.00 |

**Site 2 (3rd)**

| T0   | T1   | T3   | T10  | T30  | T60  |
|------|------|------|------|------|------|
| 0.00 | 0.00 | 0.00 | 0.01 | 0.00 | 0.01 |
| 0.00 | 0.00 | 0.00 | 0.01 | 0.01 | 0.01 |
| 0.00 | 0.01 | 0.01 | 0.02 | 0.03 | 0.03 |
| 0.03 | 0.49 | 0.89 | 0.96 | 0.96 | 0.95 |
| 0.96 | 0.50 | 0.10 | 0.00 | 0.00 | 0.00 |

**Site 3 (3rd)**

| T0   | T1   | T3   | T10  | T30  | T60  |
|------|------|------|------|------|------|
| 0.00 | 0.00 | 0.00 | 0.00 | 0.00 | 0.00 |
| 0.00 | 0.00 | 0.00 | 0.00 | 0.00 | 0.02 |
| 0.02 | 0.01 | 0.02 | 0.01 | 0.02 | 0.02 |
| 0.03 | 0.39 | 0.86 | 0.97 | 0.98 | 0.95 |
| 0.96 | 0.60 | 0.12 | 0.02 | 0.00 | 0.00 |

**Site 4 (3rd)**

| T0   | T1   | T3   | T10  | T30  | T60  |
|------|------|------|------|------|------|
| 0.00 | 0.00 | 0.00 | 0.01 | 0.00 | 0.00 |
| 0.00 | 0.00 | 0.00 | 0.00 | 0.00 | 0.00 |
| 0.01 | 0.00 | 0.01 | 0.01 | 0.02 | 0.02 |
| 0.01 | 0.13 | 0.42 | 0.71 | 0.90 | 0.95 |
| 0.98 | 0.86 | 0.56 | 0.27 | 0.07 | 0.02 |

**Site 5 (3rd)**

| T0   | T1   | T3   | T10  | T30  | T60  |
|------|------|------|------|------|------|
| 0.00 | 0.00 | 0.00 | 0.00 | 0.00 | 0.00 |
| 0.00 | 0.00 | 0.01 | 0.01 | 0.01 | 0.01 |
| 0.01 | 0.01 | 0.02 | 0.02 | 0.03 | 0.03 |
| 0.03 | 0.26 | 0.65 | 0.94 | 0.96 | 0.96 |
| 0.96 | 0.73 | 0.32 | 0.03 | 0.01 | 0.01 |



**Supplementary Table S6: Quantification results for glycopeptides from sPdp B by mass spectrometry**  
**file: #LY3LY6 raw**

**Site 1**

| ions used for quantification | z | [M+H] <sup>+</sup> | peptide [M+H] <sup>+</sup> | glycan  | glycan sturcture        | peptide sequence             | Average | SD    |
|------------------------------|---|--------------------|----------------------------|---------|-------------------------|------------------------------|---------|-------|
| 1384.28                      | 3 | 4150.84            | 3258.52                    | 892.32  | (HexNAc2Hex3)           | NITLAQIDCTENQDLCMEHNIPGFPSLK | 0.15    | 0.012 |
| 1432.97                      | 3 | 4296.91            | 3258.52                    | 1038.39 | (HexNAc2Hex3)Fuc        | NITLAQIDCTENQDLCMEHNIPGFPSLK | 0.08    | 0.005 |
| 1451.98                      | 3 | 4353.94            | 3258.52                    | 1095.42 | (HexNAc2Hex3)HexNAc     | NITLAQIDCTENQDLCMEHNIPGFPSLK | 0.29    | 0.021 |
| 1481.65                      | 3 | 4442.95            | 3258.52                    | 1184.43 | (HexNAc2Hex3)Fuc2       | NITLAQIDCTENQDLCMEHNIPGFPSLK | 0.02    | 0.004 |
| 1492.32                      | 3 | 4474.98            | 3258.52                    | 1216.46 | (HexNAc2Hex3)Hex2       | NITLAQIDCTENQDLCMEHNIPGFPSLK | 0.20    | 0.028 |
| 1500.67                      | 3 | 4500.01            | 3258.52                    | 1241.49 | (HexNAc2Hex3)FucHexNAc  | NITLAQIDCTENQDLCMEHNIPGFPSLK | 0.13    | 0.014 |
| 1546.34                      | 3 | 4637.02            | 3258.52                    | 1378.50 | (HexNAc2Hex3)Hex3       | NITLAQIDCTENQDLCMEHNIPGFPSLK | 0.07    | 0.008 |
| 1568.36                      | 3 | 4703.08            | 3258.52                    | 1444.56 | (HexNAc2Hex3)FucHexNAc2 | NITLAQIDCTENQDLCMEHNIPGFPSLK | 0.02    | 0.001 |
| 1600.36                      | 3 | 4799.08            | 3258.52                    | 1540.56 | (HexNAc2Hex3)Hex4       | NITLAQIDCTENQDLCMEHNIPGFPSLK | 0.05    | 0.009 |
| 1654.38                      | 3 | 4961.14            | 3258.52                    | 1702.62 | (HexNAc2Hex3)Hex5       | NITLAQIDCTENQDLCMEHNIPGFPSLK | 0.01    | 0.004 |

**Site 2**

| ions used for quantification | z | [M+H] <sup>+</sup> | peptide [M+H] <sup>+</sup> | glycan  | glycan sturcture          | peptide sequence | Average | SD    |
|------------------------------|---|--------------------|----------------------------|---------|---------------------------|------------------|---------|-------|
| 1228.52                      | 2 | 2456.03            | 1579.70                    | 876.33  | (HexNAc2Hex2)Fuc          | NSDVNNSIDYEGPR   | 0.03    | 0.004 |
| 1236.51                      | 2 | 2472.03            | 1579.70                    | 892.32  | (HexNAc2Hex3)             | NSDVNNSIDYEGPR   | 0.07    | 0.005 |
| 1301.55                      | 2 | 2602.09            | 1579.70                    | 1022.39 | HexNAc2Hex2Fuc2           | NSDVNNSIDYEGPR   | 0.01    | 0.003 |
| 1309.55                      | 2 | 2618.09            | 1579.70                    | 1038.39 | (HexNAc2Hex3)Fuc          | NSDVNNSIDYEGPR   | 0.11    | 0.007 |
| 1317.54                      | 2 | 2634.09            | 1579.70                    | 1054.38 | (HexNAc2Hex3)Hex          | NSDVNNSIDYEGPR   | 0.01    | 0.001 |
| 1338.05                      | 2 | 2675.10            | 1579.70                    | 1095.40 | (HexNAc2Hex3)HexNAc       | NSDVNNSIDYEGPR   | 0.10    | 0.005 |
| 1382.57                      | 2 | 2764.15            | 1579.70                    | 1184.44 | (HexNAc2Hex3)Fuc2         | NSDVNNSIDYEGPR   | 0.07    | 0.006 |
| 1390.56                      | 2 | 2780.13            | 1579.70                    | 1200.42 | (HexNAc2Hex3)HexFuc       | NSDVNNSIDYEGPR   | 0.00    | 0.002 |
| 1398.57                      | 2 | 2796.15            | 1579.70                    | 1216.45 | (HexNAc2Hex3)Hex2         | NSDVNNSIDYEGPR   | 0.11    | 0.014 |
| 1411.09                      | 2 | 2821.17            | 1579.70                    | 1241.47 | (HexNAc2Hex3)FucHexNAc    | NSDVNNSIDYEGPR   | 0.17    | 0.005 |
| 1439.59                      | 2 | 2878.18            | 1579.70                    | 1298.48 | (HexNAc2Hex3)HexNAc       | NSDVNNSIDYEGPR   | 0.03    | 0.009 |
| 1479.59                      | 2 | 2958.19            | 1579.70                    | 1378.48 | (HexNAc2Hex3)Hex3         | NSDVNNSIDYEGPR   | 0.04    | 0.009 |
| 1484.11                      | 2 | 2967.23            | 1579.70                    | 1387.52 | (HexNAc2Hex3)Fuc2HexNAc   | NSDVNNSIDYEGPR   | 0.08    | 0.005 |
| 1492.11                      | 2 | 2983.22            | 1579.70                    | 1403.51 | (HexNAc2Hex3)HexHexNAcFuc | NSDVNNSIDYEGPR   | 0.02    | 0.000 |
| 1512.63                      | 2 | 3024.25            | 1579.70                    | 1444.55 | (HexNAc2Hex3)FucHexNAc2   | NSDVNNSIDYEGPR   | 0.06    | 0.011 |
| 1560.62                      | 2 | 3120.24            | 1579.70                    | 1540.54 | (HexNAc2Hex3)Hex4         | NSDVNNSIDYEGPR   | 0.03    | 0.009 |
| 1585.65                      | 2 | 3170.30            | 1579.70                    | 1590.60 | (HexNAc2Hex3)Fuc2HexNAc2  | NSDVNNSIDYEGPR   | 0.04    | 0.007 |
| 1641.65                      | 2 | 3282.30            | 1579.70                    | 1702.59 | (HexNAc2Hex3)Hex5         | NSDVNNSIDYEGPR   | 0.01    | 0.002 |
| 1722.68                      | 2 | 3444.37            | 1579.70                    | 1864.66 | (HexNAc2Hex3)Hex6         | NSDVNNSIDYEGPR   | 0.00    | 0.001 |

**Site 3**

| ions used for quantification | z | [M+H] <sup>+</sup> | peptide [M+H] <sup>+</sup> | glycan  | glycan sturcture         | peptide sequence                | Average | SD    |
|------------------------------|---|--------------------|----------------------------|---------|--------------------------|---------------------------------|---------|-------|
| 1363.69                      | 3 | 4089.07            | 3212.71                    | 876.36  | HexNAc2Hex2Fuc           | QSQPAVAVVADLPAYLANETFTVPVIVQSGK | 0.03    | 0.006 |
| 1369.02                      | 3 | 4105.07            | 3212.71                    | 892.36  | HexNAc2Hex3              | QSQPAVAVVADLPAYLANETFTVPVIVQSGK | 0.07    | 0.009 |
| 1412.38                      | 3 | 4235.13            | 3212.71                    | 1022.42 | HexNAc2Hex2Fuc2          | QSQPAVAVVADLPAYLANETFTVPVIVQSGK | 0.01    | 0.002 |
| 1417.71                      | 3 | 4251.13            | 3212.71                    | 1038.42 | (HexNAc2Hex3)Fuc         | QSQPAVAVVADLPAYLANETFTVPVIVQSGK | 0.19    | 0.029 |
| 1466.40                      | 3 | 4397.19            | 3212.71                    | 1184.48 | (HexNAc2Hex3)Fuc2        | QSQPAVAVVADLPAYLANETFTVPVIVQSGK | 0.14    | 0.015 |
| 1477.06                      | 3 | 4429.18            | 3212.71                    | 1216.47 | (HexNAc2Hex3)Hex2        | QSQPAVAVVADLPAYLANETFTVPVIVQSGK | 0.10    | 0.018 |
| 1485.40                      | 3 | 4454.20            | 3212.71                    | 1241.49 | (HexNAc2Hex3)FucHexNAc   | QSQPAVAVVADLPAYLANETFTVPVIVQSGK | 0.21    | 0.018 |
| 1531.07                      | 3 | 4591.22            | 3212.71                    | 1378.51 | (HexNAc2Hex3)Hex3        | QSQPAVAVVADLPAYLANETFTVPVIVQSGK | 0.06    | 0.004 |
| 1534.09                      | 3 | 4600.26            | 3212.71                    | 1387.55 | (HexNAc2Hex3)Fuc2HexNAc  | QSQPAVAVVADLPAYLANETFTVPVIVQSGK | 0.09    | 0.014 |
| 1585.09                      | 3 | 4753.28            | 3212.71                    | 1540.57 | (HexNAc2Hex3)Hex4        | QSQPAVAVVADLPAYLANETFTVPVIVQSGK | 0.06    | 0.012 |
| 1601.78                      | 3 | 4803.34            | 3212.71                    | 1590.63 | (HexNAc2Hex3)Fuc2HexNAc2 | QSQPAVAVVADLPAYLANETFTVPVIVQSGK | 0.02    | 0.003 |
| 1639.11                      | 3 | 4915.34            | 3212.71                    | 1702.63 | (HexNAc2Hex3)Hex5        | QSQPAVAVVADLPAYLANETFTVPVIVQSGK | 0.03    | 0.007 |
| 1693.13                      | 3 | 5077.39            | 3212.71                    | 1864.68 | (HexNAc2Hex3)Hex6        | QSQPAVAVVADLPAYLANETFTVPVIVQSGK | 0.01    | 0.003 |

**Site 4**

| ions used for quantification | z | [M+H] <sup>+</sup> | peptide [M+H] <sup>+</sup> | glycan  | glycan sturcture         | peptide sequence | Average | SD    |
|------------------------------|---|--------------------|----------------------------|---------|--------------------------|------------------|---------|-------|
| 1300.55                      | 2 | 2600.10            | 1707.78                    | 892.33  | (HexNAc2Hex3)            | IDADFNATFYSMANK  | 0.06    | 0.017 |
| 1373.58                      | 2 | 2746.15            | 1707.78                    | 1038.38 | (HexNAc2Hex3)Fuc         | IDADFNATFYSMANK  | 0.00    | 0.000 |
| 1402.09                      | 2 | 2803.18            | 1707.78                    | 1095.41 | (HexNAc2Hex3)HexNAc      | IDADFNATFYSMANK  | 0.14    | 0.033 |
| 1462.60                      | 2 | 2924.20            | 1707.78                    | 1216.43 | (HexNAc2Hex3)Hex2        | IDADFNATFYSMANK  | 0.04    | 0.007 |
| 1475.12                      | 2 | 2949.23            | 1707.78                    | 1241.46 | (HexNAc2Hex3)HexNAcFuc   | IDADFNATFYSMANK  | 0.00    | 0.000 |
| 1483.12                      | 2 | 2965.23            | 1707.78                    | 1257.46 | (HexNAc2Hex3)HexNAc1Hex1 | IDADFNATFYSMANK  | 0.17    | 0.016 |
| 1543.62                      | 2 | 3086.24            | 1707.78                    | 1378.47 | (HexNAc2Hex3)Hex3        | IDADFNATFYSMANK  | 0.08    | 0.013 |
| 1564.14                      | 2 | 3127.28            | 1707.78                    | 1419.51 | (HexNAc2Hex3)HexNAcHex2  | IDADFNATFYSMANK  | 0.06    | 0.014 |
| 1624.65                      | 2 | 3248.31            | 1707.78                    | 1540.53 | (HexNAc2Hex3)Hex4        | IDADFNATFYSMANK  | 0.30    | 0.032 |
| 1645.17                      | 2 | 3289.33            | 1707.78                    | 1581.56 | (HexNAc2Hex3)HexNAcHex3  | IDADFNATFYSMANK  | 0.02    | 0.006 |
| 1705.68                      | 2 | 3410.36            | 1707.78                    | 1702.58 | (HexNAc2Hex3)Hex5        | IDADFNATFYSMANK  | 0.10    | 0.011 |
| 1786.71                      | 2 | 3572.41            | 1707.78                    | 1864.64 | (HexNAc2Hex3)Hex6        | IDADFNATFYSMANK  | 0.02    | 0.006 |

**Site 5**

| ions used for quantification | z | [M+H] <sup>+</sup> | peptide [M+H] <sup>+</sup> | glycan  | glycan sturcture           | peptide sequence       | Average | SD    |
|------------------------------|---|--------------------|----------------------------|---------|----------------------------|------------------------|---------|-------|
| 1169.55                      | 3 | 3506.66            | 2468.25                    | 1038.41 | (HexNAc2Hex3)Fuc           | LAPTYQELADTYANATSDVLIK | 0.05    | 0.020 |
| 1188.56                      | 3 | 3563.68            | 2468.25                    | 1095.43 | (HexNAc2Hex3)HexNAc        | LAPTYQELADTYANATSDVLIK | 0.27    | 0.052 |
| 1218.24                      | 3 | 3652.71            | 2468.25                    | 1184.46 | (HexNAc2Hex3)Fuc2          | LAPTYQELADTYANATSDVLIK | 0.02    | 0.004 |
| 1228.90                      | 3 | 3684.70            | 2468.25                    | 1216.45 | (HexNAc2Hex3)Hex2          | LAPTYQELADTYANATSDVLIK | 0.15    | 0.064 |
| 1237.25                      | 3 | 3709.74            | 2468.25                    | 1241.49 | (HexNAc2Hex3)FucHexNAc     | LAPTYQELADTYANATSDVLIK | 0.30    | 0.027 |
| 1256.25                      | 3 | 3766.75            | 2468.25                    | 1298.50 | (HexNAc2Hex3)HexNAc2       | LAPTYQELADTYANATSDVLIK | 0.07    | 0.023 |
| 1285.93                      | 3 | 3855.79            | 2468.25                    | 1387.54 | (HexNAc2Hex3)Fuc2HexNAc    | LAPTYQELADTYANATSDVLIK | 0.04    | 0.010 |
| 1304.94                      | 3 | 3912.81            | 2468.25                    | 1444.56 | (HexNAc2Hex3)FucHexNAc2    | LAPTYQELADTYANATSDVLIK | 0.07    | 0.009 |
| 1339.95                      | 3 | 4017.84            | 2468.25                    | 1549.59 | (HexNAc2Hex3)Fuc2HexNAcHex | LAPTYQELADTYANATSDVLIK | 0.00    | 0.001 |
| 1353.62                      | 3 | 4058.87            | 2468.25                    | 1590.62 | (HexNAc2Hex3)Fuc2HexNAc2   | LAPTYQELADTYANATSDVLIK | 0.02    | 0.002 |

**Supplementary Table S7: Quantification results for glycopeptides from sPdp B by mass spectrometry**  
**file: PDI summary-secreted-GalT\_Biological replicate\_20140729\_raw data with chart**

**Site 1**

| ions used for quantification | z | [M+H] <sup>+</sup> | peptide [M] | glycan   | glycan structure        | peptide sequence             | EV       |          | Gal      |          |
|------------------------------|---|--------------------|-------------|----------|-------------------------|------------------------------|----------|----------|----------|----------|
|                              |   |                    |             |          |                         |                              | Average  | SD       | Average  | SD       |
| 1384.28                      | 3 | 4150.84            | 3258.52     | 892.32   | (HexNAc2Hex3)           | NTLAQIDCTENQDLCLMEHNIPGFPSLK | 0.159754 | 0.003302 | 0.179435 | 0.004265 |
| 1432.97                      | 3 | 4296.91            | 3258.52     | 1038.39  | (HexNAc2Hex3)Fuc        | NTLAQIDCTENQDLCLMEHNIPGFPSLK | 0.118021 | 0.001748 | 0.113831 | 0.002365 |
| 1451.98                      | 3 | 4353.94            | 3258.52     | 1095.42  | (HexNAc2Hex3)HexNAc     | NTLAQIDCTENQDLCLMEHNIPGFPSLK | 0.288007 | 0.010657 | 0.323587 | 0.005687 |
| 1481.65                      | 3 | 4442.95            | 3258.52     | 1184.43  | (HexNAc2Hex3)Fuc2       | NTLAQIDCTENQDLCLMEHNIPGFPSLK | 0.037979 | 0.002873 | 0.010813 | 0.000675 |
| 1492.3245                    | 3 | 4474.981           | 3258.52     | 1216.461 | (HexNAc2Hex3)Hex2       | NTLAQIDCTENQDLCLMEHNIPGFPSLK | 0.122997 | 0.003081 | 0.12757  | 0.006444 |
| 1500.67                      | 3 | 4500.01            | 3258.52     | 1241.49  | (HexNAc2Hex3)FucHexNAc  | NTLAQIDCTENQDLCLMEHNIPGFPSLK | 0.159509 | 0.00244  | 0.117712 | 0.000797 |
| 1505.9965                    | 3 | 4515.99            | 3258.52     | 1257.47  | (HexNAc2Hex3)HexHexNAc  | NTLAQIDCTENQDLCLMEHNIPGFPSLK | 0.021392 | 0.001972 | 0.025992 | 0.001366 |
| 1546.3384                    | 3 | 4637.023           | 3258.52     | 1378.503 | (HexNAc2Hex3)Hex3       | NTLAQIDCTENQDLCLMEHNIPGFPSLK | 0.037595 | 0.001405 | 0.038577 | 0.001724 |
| 1560.0152                    | 3 | 4678.054           | 3258.52     | 1419.534 | (HexNAc2Hex3)Hex2HexNAc | NTLAQIDCTENQDLCLMEHNIPGFPSLK | 0.002996 | 0.001274 | 0.006373 | 0.000501 |
| 1568.36                      | 3 | 4703.08            | 3258.52     | 1444.56  | (HexNAc2Hex3)FucHexNAc2 | NTLAQIDCTENQDLCLMEHNIPGFPSLK | 0.024324 | 0.005213 | 0.020237 | 0.004043 |
| 1600.3572                    | 3 | 4799.08            | 3258.52     | 1540.56  | (HexNAc2Hex3)Hex4       | NTLAQIDCTENQDLCLMEHNIPGFPSLK | 0.024086 | 0.003187 | 0.032711 | 0.001753 |
| 1654.3757                    | 3 | 4961.135           | 3258.52     | 1702.615 | (HexNAc2Hex3)Hex5       | NTLAQIDCTENQDLCLMEHNIPGFPSLK | 0.00334  | 0.000915 | 0.003162 | 0.001878 |

**Site 2**

|           |   |          |          |          |                           |               |          |          |          |          |
|-----------|---|----------|----------|----------|---------------------------|---------------|----------|----------|----------|----------|
| 1228.517  | 2 | 2456.034 | 1579.704 | 876.33   | HexNAc2Hex2Fuc            | NSDVNSIDYEGPR | 0.042156 | 0.000435 | 0.026961 | 0.000514 |
| 1236.5135 | 2 | 2472.027 | 1579.704 | 892.323  | (HexNAc2Hex3)             | NSDVNSIDYEGPR | 0.050402 | 0.00078  | 0.064341 | 0.001376 |
| 1301.545  | 2 | 2602.09  | 1579.704 | 1022.386 | HexNAc2Hex2Fuc2           | NSDVNSIDYEGPR | 0.031554 | 0.001169 | 0.012228 | 0.000386 |
| 1309.545  | 2 | 2618.09  | 1579.704 | 1038.386 | (HexNAc2Hex3)Fuc          | NSDVNSIDYEGPR | 0.128126 | 0.003714 | 0.119859 | 0.002087 |
| 1317.5444 | 2 | 2634.089 | 1579.704 | 1054.385 | (HexNAc2Hex3)Hex          | NSDVNSIDYEGPR | 0.00197  | 0.000165 | 0.002973 | 0.000115 |
| 1338.0523 | 2 | 2675.105 | 1579.704 | 1095.401 | (HexNAc2Hex3)HexNAc       | NSDVNSIDYEGPR | 0.089328 | 0.000974 | 0.125141 | 0.001334 |
| 1382.574  | 2 | 2764.148 | 1579.704 | 1184.444 | (HexNAc2Hex3)Fuc2         | NSDVNSIDYEGPR | 0.129149 | 0.002859 | 0.067568 | 0.000297 |
| 1390.5625 | 2 | 2780.125 | 1579.704 | 1200.421 | (HexNAc2Hex3)HexFuc       | NSDVNSIDYEGPR | 0        | 0        | 0.038724 | 0.001049 |
| 1398.5749 | 2 | 2796.15  | 1579.704 | 1216.446 | (HexNAc2Hex3)Hex2         | NSDVNSIDYEGPR | 0.036887 | 0.001021 | 0.060806 | 0.001315 |
| 1411.085  | 2 | 2821.17  | 1579.704 | 1241.466 | (HexNAc2Hex3)FucHexNAc    | NSDVNSIDYEGPR | 0.209022 | 0.003922 | 0.141399 | 0.00542  |
| 1419.0801 | 2 | 2837.16  | 1579.704 | 1257.456 | (HexNAc2Hex3)HexHexNAc    | NSDVNSIDYEGPR | 0.00897  | 0.000447 | 0.017975 | 0.000525 |
| 1439.59   | 2 | 2878.18  | 1579.704 | 1298.476 | (HexNAc2Hex3)HexNAc2      | NSDVNSIDYEGPR | 0.010556 | 0.000673 | 0.019586 | 0.000714 |
| 1463.6097 | 2 | 2926.219 | 1579.704 | 1346.515 | (HexNAc2Hex3)Fuc2Hex      | NSDVNSIDYEGPR | 0        | 0        | 0.059509 | 0.001235 |
| 1479.5942 | 2 | 2958.188 | 1579.704 | 1378.484 | (HexNAc2Hex3)Hex3         | NSDVNSIDYEGPR | 0.008675 | 0.001606 | 0.014786 | 0.000324 |
| 1484.114  | 2 | 2967.228 | 1579.704 | 1387.524 | (HexNAc2Hex3)Fuc2HexNAc   | NSDVNSIDYEGPR | 0.145619 | 0.001217 | 0.074585 | 0.000445 |
| 1492.1089 | 2 | 2983.218 | 1579.704 | 1403.514 | (HexNAc2Hex3)HexHexNAcFuc | NSDVNSIDYEGPR | 0.010662 | 0.000771 | 0.0783   | 0.001901 |
| 1512.625  | 2 | 3024.25  | 1579.704 | 1444.546 | (HexNAc2Hex3)FucHexNAc2   | NSDVNSIDYEGPR | 0.0487   | 0.002327 | 0.040732 | 0.000977 |
| 1560.6196 | 2 | 3120.239 | 1579.704 | 1540.535 | (HexNAc2Hex3)Hex4         | NSDVNSIDYEGPR | 0.006095 | 0.000913 | 0.00967  | 0.000802 |
| 1585.65   | 2 | 3170.3   | 1579.704 | 1590.596 | (HexNAc2Hex3)Fuc2HexNAc2  | NSDVNSIDYEGPR | 0.040016 | 0.001522 | 0.021248 | 0.000721 |
| 1641.6477 | 2 | 3282.295 | 1579.704 | 1702.591 | (HexNAc2Hex3)Hex5         | NSDVNSIDYEGPR | 0.001595 | 0.000297 | 0.02856  | 0.000309 |
| 1722.6834 | 2 | 3444.367 | 1579.704 | 1864.663 | (HexNAc2Hex3)Hex6         | NSDVNSIDYEGPR | 0.000518 | 0.000236 | 0.000754 | 0.000168 |

**Site 3**

|           |   |          |         |          |                          |                                 |          |          |          |          |
|-----------|---|----------|---------|----------|--------------------------|---------------------------------|----------|----------|----------|----------|
| 1363.69   | 3 | 4089.07  | 3212.71 | 876.36   | HexNAc2Hex2Fuc           | QSQPAVAVVADLPAYLANETFTVPVIVQSGK | 0.033813 | 0.001039 | 0.022373 | 0.00219  |
| 1369.0233 | 3 | 4105.07  | 3212.71 | 892.3599 | HexNAc2Hex3              | QSQPAVAVVADLPAYLANETFTVPVIVQSGK | 0.046167 | 0.000961 | 0.065114 | 0.002353 |
| 1412.377  | 3 | 4235.131 | 3212.71 | 1022.421 | HexNAc2Hex2Fuc2          | QSQPAVAVVADLPAYLANETFTVPVIVQSGK | 0.022478 | 0.002667 | 0.010305 | 0.004935 |
| 1417.709  | 3 | 4251.127 | 3212.71 | 1038.417 | (HexNAc2Hex3)Fuc         | QSQPAVAVVADLPAYLANETFTVPVIVQSGK | 0.184693 | 0.003419 | 0.151288 | 0.012552 |
| 1466.397  | 3 | 4397.191 | 3212.71 | 1184.481 | (HexNAc2Hex3)Fuc2        | QSQPAVAVVADLPAYLANETFTVPVIVQSGK | 0.200042 | 0.010334 | 0.115713 | 0.004015 |
| 1471.7288 | 3 | 4413.186 | 3212.71 | 1200.476 | (HexNAc2Hex3)FucHex      | QSQPAVAVVADLPAYLANETFTVPVIVQSGK | 0        | 0        | 0.090432 | 0.003262 |
| 1477.0585 | 3 | 4429.176 | 3212.71 | 1216.466 | (HexNAc2Hex3)Hex2        | QSQPAVAVVADLPAYLANETFTVPVIVQSGK | 0.061768 | 0.00206  | 0.087111 | 0.004426 |
| 1520.4165 | 3 | 4559.25  | 3212.71 | 1346.54  | (HexNAc2Hex3)Fuc2Hex     | QSQPAVAVVADLPAYLANETFTVPVIVQSGK | 0.248142 | 0.008437 | 0.15652  | 0.007659 |
| 1485.4    | 3 | 4454.2   | 3212.71 | 1241.49  | (HexNAc2Hex3)FucHexNAc   | QSQPAVAVVADLPAYLANETFTVPVIVQSGK | 0.024198 | 0.002561 | 0.038354 | 0.002533 |
| 1531.0749 | 3 | 4591.225 | 3212.71 | 1378.515 | (HexNAc2Hex3)Hex3        | QSQPAVAVVADLPAYLANETFTVPVIVQSGK | 0        | 0        | 0.150302 | 0.009504 |
| 1534.087  | 3 | 4600.261 | 3212.71 | 1387.551 | (HexNAc2Hex3)Fuc2HexNAc  | QSQPAVAVVADLPAYLANETFTVPVIVQSGK | 0.12478  | 0.006383 | 0.066304 | 0.001971 |
| 1585.0931 | 3 | 4753.279 | 3212.71 | 1540.569 | (HexNAc2Hex3)Hex4        | QSQPAVAVVADLPAYLANETFTVPVIVQSGK | 0.018621 | 0.001266 | 0.029509 | 0.002085 |
| 1601.779  | 3 | 4803.337 | 3212.71 | 1590.627 | (HexNAc2Hex3)Fuc2HexNAc2 | QSQPAVAVVADLPAYLANETFTVPVIVQSGK | 0.026296 | 0.001862 | 0.007486 | 0.001743 |
| 1639.1118 | 3 | 4915.335 | 3212.71 | 1702.625 | (HexNAc2Hex3)Hex5        | QSQPAVAVVADLPAYLANETFTVPVIVQSGK | 0.007815 | 0.001847 | 0.006616 | 0.001291 |
| 1693.1306 | 3 | 5077.392 | 3212.71 | 1864.682 | (HexNAc2Hex3)Hex6        | QSQPAVAVVADLPAYLANETFTVPVIVQSGK | 0.001188 | 0.001396 | 0.002573 | 0.000707 |

**Site 4**

|           |   |          |          |          |                          |                               |          |          |          |          |
|-----------|---|----------|----------|----------|--------------------------|-------------------------------|----------|----------|----------|----------|
| 1300.55   | 2 | 2600.1   | 1707.775 | 892.325  | (HexNAc2Hex3)            | IDADF <sup>N</sup> NATFYSMANK | 0.115639 | 0.004286 | 0.106979 | 0.004031 |
| 1373.577  | 2 | 2746.154 | 1707.775 | 1038.379 | (HexNAc2Hex3)Fuc         | IDADF <sup>N</sup> NATFYSMANK | 0.001084 | 0.000108 | 0.001543 | 0.002378 |
| 1402.09   | 2 | 2803.18  | 1707.775 | 1095.405 | (HexNAc2Hex3)HexNAc      | IDADF <sup>N</sup> NATFYSMANK | 0.333244 | 0.007417 | 0.301583 | 0.006088 |
| 1462.6    | 2 | 2924.2   | 1707.775 | 1216.425 | (HexNAc2Hex3)Hex2        | IDADF <sup>N</sup> NATFYSMANK | 0.029004 | 0.001184 | 0.032676 | 0.000998 |
| 1475.1172 | 2 | 2949.234 | 1707.775 | 1241.459 | (HexNAc2Hex3)HexNAcFuc   | IDADF <sup>N</sup> NATFYSMANK | 0        | 0        | 0.002297 | 0.001636 |
| 1483.117  | 2 | 2965.234 | 1707.775 | 1257.459 | (HexNAc2Hex3)HexNAc1Hex1 | IDADF <sup>N</sup> NATFYSMANK | 0.270982 | 0.004411 | 0.296225 | 0.002721 |
| 1543.62   | 2 | 3086.24  | 1707.775 | 1378.465 | (HexNAc2Hex3)Hex3        | IDADF <sup>N</sup> NATFYSMANK | 0.05332  | 0.004046 | 0.054224 | 0.002388 |
| 1564.141  | 2 | 3127.282 | 1707.775 | 1419.507 | (HexNAc2Hex3)HexNAcHex2  | IDADF <sup>N</sup> NATFYSMANK | 0.053893 | 0.001712 | 0.058782 | 0.001724 |
| 1624.654  | 2 | 3248.308 | 1707.775 | 1540.533 | (HexNAc2Hex3)Hex4        | IDADF <sup>N</sup> NATFYSMANK | 0.100303 | 0.001988 | 0.100694 | 0.000869 |
| 1645.167  | 2 | 3289.334 | 1707.775 | 1581.559 | (HexNAc2Hex3)HexNAcHex3  | IDADF <sup>N</sup> NATFYSMANK | 0.011802 | 7.15E-05 | 0.014013 | 0.001139 |
| 1705.6785 | 2 | 3410.357 | 1707.775 | 1702.582 | (HexNAc2Hex3)Hex5        | IDADF <sup>N</sup> NATFYSMANK | 0.026752 | 0.000477 | 0.026192 | 0.000643 |
| 1786.7071 | 2 | 3572.414 | 1707.775 | 1864.639 | (HexNAc2Hex3)Hex6        | IDADF <sup>N</sup> NATFYSMANK | 0.003978 | 0.000179 | 0.004793 | 0.000195 |

**Site 5**

|           |   |          |         |          |                            |                        |          |          |          |          |
|-----------|---|----------|---------|----------|----------------------------|------------------------|----------|----------|----------|----------|
| 1164.219  | 3 | 3490.657 | 2468.25 | 1022.407 | HexNAc2Hex2Fuc2            | LAPTYQELADTYANATSDVLIK | 0.007498 | 0.00042  | 0.002823 | 0.00055  |
| 1169.552  | 3 | 3506.656 | 2468.25 | 1038.406 | (HexNAc2Hex3)Fuc           | LAPTYQELADTYANATSDVLIK | 0.083747 | 0.003574 | 0.07038  | 0.001489 |
| 1188.559  | 3 | 3563.677 | 2468.25 | 1095.427 | (HexNAc2Hex3)HexNAc        | LAPTYQELADTYANATSDVLIK | 0.140543 | 0.012651 | 0.236625 | 0.011667 |
| 1218.238  | 3 | 3652.714 | 2468.25 | 1184.464 | (HexNAc2Hex3)Fuc2          | LAPTYQELADTYANATSDVLIK | 0.105352 | 0.005199 | 0.060391 | 0.002118 |
| 1223.5721 | 3 | 3668.716 | 2468.25 | 1200.466 | (HexNAc2Hex3)FucHex        | LAPTYQELADTYANATSDVLIK | 0        | 0        | 0.027782 | 0.002503 |
| 1228.901  | 3 | 3684.703 | 2468.25 | 1216.453 | (HexNAc2Hex3)Hex2          | LAPTYQELADTYANATSDVLIK | 0.050608 | 0.002317 | 0.087444 | 0.002141 |
| 1237.246  | 3 | 3709.738 | 2468.25 | 1241.488 | (HexNAc2Hex3)FucHexNAc     | LAPTYQELADTYANATSDVLIK | 0.280134 | 0.013315 | 0.199494 | 0.003925 |
| 1256.2498 | 3 | 3766.749 | 2468.25 | 1298.499 | (HexNAc2Hex3)HexNAc2       | LAPTYQELADTYANATSDVLIK | 0.128149 | 0.010493 | 0.09749  | 0.005034 |
| 1272.2555 | 3 | 3814.767 | 2468.25 | 1346.517 | (HexNAc2Hex3)Fuc2Hex       | LAPTYQELADTYANATSDVLIK | 0        | 0        | 0.029434 | 0.002086 |
| 1285.931  | 3 | 3855.793 | 2468.25 | 1387.543 | (HexNAc2Hex3)Fuc2HexNAc    | LAPTYQELADTYANATSDVLIK | 0.108701 | 0.004155 | 0.063348 | 0.002127 |
| 1304.937  | 3 | 3912.811 | 2468.25 | 1444.561 | (HexNAc2Hex3)FucHexNAc2    | LAPTYQELADTYANATSDVLIK | 0.037111 | 0.005158 | 0.054704 | 0.00606  |
| 1339.9481 | 3 | 4017.844 | 2468.25 | 1549.594 | (HexNAc2Hex3)Fuc2HexNAcHex | LAPTYQELADTYANATSDVLIK | 0.008525 | 0.000268 | 0.045152 | 0.021125 |
| 1353.623  | 3 | 4058.869 | 2468.25 | 1590.619 | (HexNAc2Hex3)Fuc2HexNAc2   | LAPTYQELADTYANATSDVLIK | 0.04963  | 0.001221 | 0.024934 | 0.008275 |
